# Supplementary material for: A pilot study for whole proteome tagging in Caenorhabditis elegans
Source: eLife. 2026 Jun 24;15:RP110717. doi: 10.7554/eLife.110717 (PMC13293606; doi:10.7554/eLife.110717)
Supplement: Supplementary file 2. — Source numerical data for plots in Figures 3B, C, D, 8D. [file elife-110717-supp2.xlsx]

## Sheet: Fig 3
Fig. 3B	Blue positive fraction of F1s					Green positive fraction of F1s					Red positive fraction of F1s					All 3 positive fraction of F1s
1	0	0	0	0	0	0.013986	0.095	0.00704225	0.126126	0.191176	0	0	0	0	0.007353	0	0	0	0	0
2	0.090566	0.10396	0.147727	0.141975	0.064706	0.0754717	0.0643564	0.0454545	0.0493827	0.00588235	0.083019	0.049505	0.022727	0.055556	0.035294	0.007547	0	0	0	0
3	0.025532	0.052288	0.019608	0.003636	0.047431	0.0297872	0.0784314	0.0490196	0.0145455	0.0750988	0.06383	0.03268	0.078431	0.018182	0.094862	0.008511	0	0.004902	0	0
4	0	0	0	0	0	0	0.0169492	0.0217391	0	0	0	0	0	0	0	0	0	0	0	0
5						0.121622	0.122807	0.0751445	0.0419162	0.0344828	0.067568	0.116959	0.034682	0.047904	0.041379	0	0	0	0	0
6	0.138614	0.118644	0.103448	0.139535	0.083721	0.019802	0.0254237	0.0344828	0.0232558	0.00465116	0	0	0.034483	0	0	0	0	0	0	0
7	0.008	0.029586	0	0	0	0.096	0.106509	0.03125	0	0	0	0	0	0	0	0	0	0	0	0
8	0	0	0.062893	0.035714	0.066667	0	0	0	0	0	0	0	0.018868	0.015873	0.019048	0	0	0	0	0
9	0	0.159091	0.012195	0.079365	0.065789	0	0.340909	0.0243902	0.111111	0.0657895	0	0.159091	0	0.015873	0.039474	0	0.022727	0	0.015873	0
10	0.164384	0.198157	0.07197	0.055838	0.066667	0.0593607	0.0599078	0.0227273	0.00507614	0.00606061	0.041096	0.032258	0.011364	0.020305	0.012121	0.004566	0	0	0	0
Fig. 3C
4	6	10	3	2	1	5	8	7	9		4R	10R	6R
270	358	47	235	265	143	148	6	125	52		88	219	101
257	269	284	153	202	200	171	20	169	44		59	217	118
337	159	323	204	88	284	173	159	96	82		46	264	29
205	208	308	275	162	111	167	252	12	63		87	197	129
198	224	270	253	170	136	145	105	10	76		106	165	215
Fig. 3D
Brood size	Fraction positive for any fluorophore
143	0.013986
200	0.095
284	0.00704225
111	0.126126
136	0.198529
265	0.184906
202	0.183168
88	0.204545
162	0.203704
170	0.0941176
235	0.0808511
153	0.130719
204	0.102941
275	0.0363636
253	0.158103
88	0
59	0.0169492
46	0.0217391
87	0
106	0
148	0.141892
171	0.192982
173	0.0982659
167	0.0838323
145	0.0758621
101	0.148515
118	0.135593
29	0.137931
129	0.155039
215	0.0883721
125	0.104
169	0.130178
96	0.03125
12	0
10	0
6	0
20	0
159	0.081761
252	0.0436508
105	0.0857143
52	0
44	0.454545
82	0.0365854
63	0.15873
76	0.157895
219	0.205479
217	0.258065
264	0.0984848
197	0.071066
165	0.0727273

## Sheet: Fig 8D
Distance_(microns)	F54C8.1																					N2
0	2115	1306	3316.28	1626	2686	2306.56	1941.11	4757.5	7743.5	729.167	1435	1553.33	7760.61	2691.83	5004.33	3078.06	2976.61	2657.89	6509	1397.17		1391	3190	3665	1451	2538	17511.2	2199.39	1973.5	4122	15487	2788	4083	2474	1302.5	2762.25	3517	2920	4072	17378.5	6835	8831	5331.5	5967.17	8527
0.08235	2075.16	1252.29	4159.99	1612.91	3444.92	1002.16	1260.88	10042.6	8716.21	1789.71	1830.12	1556.85	8743.37	4895.53	3586.84	1701.1	3176.34	1016.76	3278.63	1541.55		1276.82	2302.67	3160.36	2107.57	3216.17	11371.5	2887.91	1698.66	2604.28	17559.4	2707.55	4769.87	2557.2	2817.68	2751.07	2451.97	3121.95	8494.43	17048	6347.04	8855.5	7668.49	8802.97	4658.59
0.1647	2452.72	1551.25	3833.84	3118.61	2222.49	2946.47	3335.95	10093.8	5009.02	1798.13	1162.79	3079.06	7313.1	2199.78	3999.46	1874.26	5028.92	1895.06	2144.69	2067.61		2244.01	3502.35	3645.43	1780.95	1654.65	17150.8	1459.96	1393.59	2169.36	17247	1964.12	6020.24	3123.84	3397.61	2582.35	4177.1	3497.31	14482.6	18811.8	3800.67	5179.58	4998.41	5770.06	5490.92
0.24705	2805.46	1553.22	3698.62	2853.22	1792.35	3359.76	2531.94	7029.9	6335.59	3060.45	898.173	2197.36	3080.37	1686.78	5895.58	3494.12	3995.4	3116.04	2607.87	3724.79		4027.97	3432.2	4981.25	1961.64	1644.51	9446.83	2177.75	1993.12	2837.98	22367.6	1120.65	5841.68	3771.29	2068.39	2126.18	5378.21	3355.99	23389.4	20282.7	3335.2	7799.53	5248.69	6307.33	5868.08
0.3294	4371.35	1119.75	2694.7	1968.7	1636.11	2974.56	2978.1	4681.6	5682.94	2666.78	1029.19	2237.95	3400.26	1902.95	4281.7	3029.23	4736.52	4173.22	2266.57	4381.98		1769.81	1668.95	8534.86	1969.11	4928.83	7728.86	2643.53	3232.74	3360.04	21588.8	1001.36	2788.74	2644.94	1745.89	2372.49	4885.13	4344.24	20238.6	19665.5	4586.83	6651.12	4955.89	4440.1	3976.02
0.41175	4061	1354.34	1689.45	5341.22	2702.11	3984.52	2348.76	4893.6	4873.94	2189.12	1836.25	1154.99	3759.32	2141.85	4381.15	2194.78	4646.28	3092.76	2227.05	3384.38		2688.65	2632.32	5963.56	1363.85	4539.19	3359.4	2993.55	1731.12	3726.33	22598.2	1673.21	4433.53	4125.72	2057.8	1460.89	5498.03	13643.9	27768.1	16210	3474.55	5083.98	4162.56	4990.48	4501.15
0.4941	4117.48	2216.04	3502.97	6078.8	2173.67	3940.62	2646.45	5502.67	6174.4	2148.18	2894	918.212	2585.81	2913.98	4336.44	3177.97	6130.39	3682.72	2406.92	3910.16		3514.03	3418.4	6504.67	1279.75	2406.32	4534.31	3723.58	1728.67	4274.15	20666.1	1465.41	5004.88	3944.74	5184.35	4569.17	4503.89	19744.8	35965.2	12928.7	3695.44	5280.36	6856.68	10489	5902.14
0.57645	2445.71	2302.71	6402.57	3650.79	3254.07	3368.25	4331.66	6239.93	4039.86	2988	3284.71	1161.02	1430.72	3510.38	3788.05	2673.95	6656.21	2834.38	4071.74	4067.86		3314.43	2154.29	6556.14	1986.43	4336.29	8839.67	4798.9	1632.71	8118.71	20439.4	1897.64	3340	2020	1983.71	3510.07	4619.29	25770	37681.6	11940.4	4054.43	5909.57	5564.21	11286.5	6700.27
0.6588	3076.99	1835.24	5552.96	2744.1	5730.02	4001.83	3537.62	4747.43	3919.74	2710.23	3353.68	1241.61	3213.98	2597.76	2801.69	3406.61	4101.43	4138.31	2533.75	5337.12		3376.69	2046.33	3626.86	1706.16	2481.1	8211.37	5873.07	1412.99	7430.63	18457.5	3762.9	4331.19	4353.48	2673.2	3192.23	3489.08	18097.1	44405.4	9543.81	3924.74	6411.65	6242.55	8052.27	5111.64
0.74115	5860.57	2108.4	5286.7	3233.16	2571.07	3995.53	5070.6	3815.36	5100.27	3862.02	3482.28	1726.12	3638.59	1828.79	6548.41	5050.94	5522.82	4620.77	3471.3	9392.8		4771.64	2344.71	3856.71	1605.69	2504.64	12318.2	8112.5	2542.21	5161.66	15565	4774.28	3450.23	5898.8	2642.9	3127.88	6045.88	20527.3	53030.9	8081.69	2730	6265.44	9938.83	11493.5	4217.91
0.8235	9110.58	1766.15	6318.98	3247.05	5421.9	2970.93	3961.34	3994.47	8327.45	6134.83	2593.52	5168.58	1792.6	4976.73	4252.71	5202.83	7932.62	3733.8	5107.33	10537.7		10557.2	2445.06	4436.56	1404.99	1528.26	12846.6	8546.82	3058.84	3690.92	9155.22	5873.07	4550.66	5863.23	3130.19	2690.99	9619.77	24611.3	57410.6	7750.22	3896.24	3652.36	8332	12603.6	5451.6
0.90585	16441.2	4109.36	3797.07	3275.11	8895.59	1805.42	6324.86	6083.05	6510.44	5069.29	3982.54	5055.86	4226.6	7350.32	6845.63	4864.88	3554.56	2743.77	8469.5	10327.4		10451.8	2550.1	4733.71	1884.43	1885.95	16820.2	8113.36	2676.79	5629	11577.9	8699.77	3453.16	4895.95	2870.72	2278.67	11871.9	31347.9	60471.5	7192.99	5283.13	2351.83	8368.09	11494.9	8698.69
0.98819	22326.8	7336.86	4273.2	4266.06	10693.9	1683.47	7402.93	9631.82	6491.58	6489.92	4286.3	4864.42	4979.93	9892.52	12222.4	6643.87	2630.01	3097.52	8032.87	11307.9		16535.4	4083.37	4024.88	6834.59	1443.49	22677.9	8430.27	3397.76	10470.7	12380	10388.2	5998.82	4128	2622.94	2871.74	11439.7	32465.4	64422.3	7342.73	4400.61	2191.53	8979.51	13533.6	4583.22
1.07054	24888.2	11446.8	5286.2	4106.24	9255.84	2311.58	10359.9	14486.7	5684.79	7258.19	6581.93	9018.44	10130.6	11088.4	14749	9999.56	3689.19	2505.45	7887.78	15938.3		26899.5	5826.88	5675.56	7569.5	2623.82	42219	14138.1	6130.89	8958.57	12038.3	13924	7543.95	5693.81	5452.03	5128.73	13108.6	36361.8	65523.4	10697	3485.18	3376.07	17116.1	14479	6788.05
1.15289	26184.4	13380.7	3449.77	5615.5	10733.4	4828.26	19346.1	24640.7	9349.21	7551.36	9946.5	10641	12505.3	14871.5	22738.1	11215.5	4318.49	5249.64	13958.1	16641.1		36152.3	4371.14	4927.43	10451.3	4082.14	52339.5	21541.4	6394.29	12639.1	12074.4	17002.4	9658.86	4236.14	6669.36	6730.25	20017	44085.7	64110.7	9428.32	4329.71	5296.43	16077.9	17897	11649
1.23524	41033.9	22298.3	8677.25	7748.18	18303.3	5790.47	31336.2	39600.2	17540.6	9742.19	14071.8	12495.8	17162.5	18719.1	27380.8	8715.91	3742.36	9401.24	11351.5	21959		47848.2	5785.25	9098.65	13426.9	3188.77	56994.1	30993.4	8639.16	19027	20138.3	21103	15473.7	7728.64	10240	12943.6	19921	45747.6	64423.8	9891.72	4039.08	6132.57	16809.6	18614.9	11895.4
1.31759	46507.5	34682.8	11944.6	12418.3	21355.4	4696.9	45285.6	48682.5	17284	14873.4	19828.6	19180.2	22181.4	27014	34586.3	11564.7	7456.32	14217.6	16131.4	24042.2		59951.4	7600.85	12260.8	19194.3	7301.82	60564.2	33343.7	12384.9	25047.3	29255.8	21361.1	25436.2	6575.59	12762.1	27032.6	30299.6	42100.8	64236.6	21043.7	8339.28	7020.85	16255.9	25550.5	25051
1.39994	39074.2	38912.9	11283.5	20337	25226.4	6260.78	55609	55159.4	16348.5	23370.6	26690.4	29698.6	20113.5	34481.7	40758.8	15971.1	10680.9	15631.5	18230.9	25564.8		64726.8	13977.5	14033.5	26204.4	17126.5	63756.2	51614.2	24866.1	26450	30849	34203.4	27827.6	5279.92	12513.1	32371.3	43928	52567.9	64944.8	30564.6	7641.84	11461.8	26514.8	31484.1	30251
1.48229	42937.1	41082.7	15187	31061	30264.4	12542.6	58174.4	62633.7	26445.7	37166.7	45298.5	32486.8	20948.5	47900.8	46549.4	19433.7	16226.4	23451	23543.3	30955.9		63625.3	18675.4	26648.3	35049.1	21465.3	65154.7	62016	30454.8	34145.2	43135.2	42057.9	46930.9	11641.1	26841.6	51543.9	55622.2	48404.8	65457.3	35351.6	11556.5	18912.3	34768.9	35707.7	40630.3
1.56464	46943.3	39421.8	21688.6	35323.8	29198.2	22575.6	65385.1	63015.1	29796.8	46346.6	46880.4	44518.9	22064.3	49915.9	50513.4	21052.4	19806.6	36219.5	26506.2	27503.5		64764.1	26916.1	39779.9	45885.2	32247.6	63546.1	65530.7	47584.6	37627.1	55181.4	52051.4	54802.9	22601.7	44501.1	56165.1	61723.1	50126.4	63146.3	31468.4	13210.8	29220.1	39575.9	43965.9	56037.2
1.64699	45367.4	39853.6	31726.9	36592.4	37028.1	31538.7	65408.4	63704.4	38242.1	48205.1	50972.7	44527.7	21478.6	55875.4	51865.7	32417.3	18593.4	42976	27474.3	32369.4		65233.7	41964.5	44035.3	58060.1	50412.5	65272.6	64822.8	55785.1	34981.1	62690.8	59483.1	62458.5	28565.5	54913.5	64110.2	64657.8	61116.7	61947	47534.6	28878.9	46577	47746	49978.3	63336.7
1.72934	54054.2	49945.7	31778.3	47442.3	40736.5	40711.7	64795.4	65535	42594.9	46764.8	59119.4	43800.7	22373.1	60342.2	58345.4	37404.5	26500.2	49050.9	28755.3	31579.2		65079.4	58431.4	49355.4	63061.9	55462.7	65023.8	65326.3	60069.4	34066.4	63648.6	59183.2	62913.4	41354.4	61784.1	65535	64826.2	56060.2	65535	52135	38943.9	50080.9	51559.2	49187.9	64936
1.81169	55986.6	46098.3	33981.1	49392.7	40862	44628.7	65535	65535	37801.1	56982.8	55718.2	51527.4	23432.8	60648.3	54218.2	38350.6	32379	59362.2	32732.8	26401.5		65535	60305.6	56820.2	56604.4	60457	65415.4	65502.1	63755.7	43998.5	64949.3	58808.8	65535	49066.4	63442.1	65535	65535	56814.4	65535	53105.6	47982.2	47752.6	54001.5	62113.1	65535
1.89404	49384.2	49620.6	30197.8	54065.5	44659.8	54765.1	65535	65535	38726.7	51523	59820.6	50924	20011.2	58330.6	56941.3	31940.1	31542	60160.7	43067.7	30950.3		65493.9	65072.7	62333.1	58615.4	59528.3	65535	65535	64795.9	47392.9	65535	59518.9	65290.8	55378.4	64907.1	65535	65535	52985.4	65016.9	53414.2	38500	55960.1	59402.2	60148.5	65535
1.97639	48339.9	44602.8	35163.4	55652.2	45692.8	56234.7	65535	65452.6	32066.7	51862.2	58177.9	52424	22761.1	60433.1	54012.3	37158.3	30583.8	53536.3	41222.2	33526.2		65480.9	65015.1	61457.5	57611.1	61745.3	65535	65535	64649.5	43710.2	65477.3	62657.3	65317.9	61151.7	64174.3	65535	65535	58721.5	61213	54077.4	50238.9	54005.5	60964.4	63644.7	65484
2.05874	50168.1	46952	38653.9	50390.1	42820.9	55174.6	65535	64667.9	36112.1	60961.6	61489.5	46935.4	22937.2	63348.9	54565.9	38393.5	30536.6	48556.4	40075.7	33374.8		65535	64697	59599	60040	58013.6	65535	65535	65301.1	49778.6	64697	62972.3	65292.1	62018.3	64013.9	65535	65535	61264.8	64727.2	57603.2	50933.3	58267.1	61006.4	63306	65494.8
2.14109	56046.6	50195.5	38886.6	50786.9	44371.6	51170.8	65535	64732.2	37210.6	57335.7	56926.8	46174.4	21146.5	59155.9	54716.8	44807.5	32556.5	58532.8	34433.3	36991.3		65309.3	64426.1	59791.4	58595.4	53405.9	65355.1	65535	63117.1	55054.4	64318.4	65316	65535	62942.4	58168.4	65535	65535	53704.8	64789.6	55505.1	40799.4	56335.1	59070.9	59994.3	65535
2.22344	54670.9	51175.8	27909.2	52891.4	48708.7	49656	65535	65078.7	42618	52843.6	57235	48422.5	23050.8	60771.2	46401.1	35201.1	25190.5	51694.7	36119	28832.4		63831.9	62865.7	52886.6	56754.9	50974.6	64516.8	65522.2	63737.5	50941.8	64226.2	59432.4	65380.7	64915.5	54874.7	65535	63403.2	54948.3	62883.5	60037.7	49313.8	41772.8	56458.1	58826.1	65535
2.30579	53868.6	41645.3	23556.4	53911.1	48894	47222.7	65212.6	65087.7	36169.9	48512.2	57785.9	41046.5	19474.8	60622.3	56266.2	30359.2	20492.5	48132.6	28169.6	30953.8		65201.2	57937	47169.4	57402.7	55091.9	65103.1	65153.3	65382.7	49100.2	65535	58083	63427.3	63287.2	49785.9	64149	58138.2	53176.6	64244.6	60991.2	43297.5	33009	53987.1	55363.7	64654.5
2.38814	52296.2	41724.6	20357.5	49272.3	47401.9	40080	65170	61967.9	34216.3	50337.2	54050.3	39243.6	16737.3	54816.4	52106.1	30095.1	12640.7	39057.2	22675.5	28559.6		64185.3	49552.1	40779.6	44501.2	37458.7	65055.8	64006.2	65535	46606.8	65417.2	53320.4	62435.3	62272.2	42133.6	61142.6	55249	57057.5	62879.7	49129.5	32346.5	38672.6	52988.7	57672	61286.6
2.47049	49542.5	31827.8	22343.5	37547.2	42540.1	38626	63980.2	58914.8	31078.2	46407.1	46498.9	32013.3	16587.7	46153.4	47255.2	25569.5	15446.6	42790	18041.1	24631.5		63739.9	49589.4	34715.1	38497.5	28248	64494.9	63546.1	62642.6	43022.4	64122.8	45171.1	49902.4	56640.3	24388.1	54783.9	44176.4	48797	62929.2	45510.6	18288.8	29016.1	47527.9	53634.8	61923.1
2.55284	51455.2	20356	23829.4	20595.1	34561.2	28066.4	60524.1	52540.6	24084.5	46248.6	43949.4	40233.7	10024.2	44733.8	41415.6	19489	8817.43	29084.8	14647.5	27285.8		61217.4	37023.9	22981.4	29156.8	12319.1	61448.2	60945.9	55350.6	37778.7	63305.3	38829.1	28869.8	43879.9	14223.8	40966.3	36699.3	51107.6	64328.6	34671.2	17407.8	16841.8	44868.4	53964.2	40897.6
2.63519	59237.5	12247.5	20987.1	20993.1	23526.8	16002.6	51775.4	37247.1	19004.9	41361.2	38660.1	32484	6507.88	47728	33323.2	15857	5666.32	18890.5	14615.8	29032.9		56579.4	25059.2	11613	24087.7	4512.22	62638.7	50391.4	51590.5	37268.1	53997.8	31887.4	25048.5	26408.8	8924.89	20975.3	32940.1	47202.5	63261.7	34620.2	14550.4	8210.51	37812.2	36382.7	29304.2
2.71754	55817.1	5761.03	14156.3	12584.2	20776.8	8494.99	43314.9	30674.8	21454.8	34397.5	28125.2	26889.2	3687	46863.6	24511.7	16481.7	3671.67	14825	13872.5	25044.2		36634.2	15050.8	10863.2	15613.2	4530.43	61744.9	28788.9	40343.4	29374.2	33955.2	17389.3	15066.9	22667.2	8685.86	14726	28169.5	39088.3	64636.6	23775.4	10248.2	2768.36	23659.6	25413.7	16799
2.79989	44253.3	3705.62	10395.6	5550.21	18172.3	6591.06	23850.3	18777.9	19532.8	26982.2	19550.3	18992.5	3411.78	28250	12587.4	16919	3938.78	9806.74	7874.75	21119.3		24488.2	12429.1	6283.52	10261.4	2983.43	58639.2	18490.2	24585.7	24015.6	33863.8	13028	9696.3	15023.1	6480.1	6020.81	21506.7	38748.7	59363.6	10842.6	6757.8	3830.16	22152.2	20876.4	13148.3
2.88224	40212.4	5090.86	8636.75	2179.21	11485.2	5385.69	19409.2	14588.9	9247.64	25051.5	13349	16731.8	3866.25	18841.5	12418.8	18512	3441.22	7389.61	9192.55	16250.4		20018.9	5084	4097.29	9288	1860.71	50927.7	13778.4	11873.6	19095.1	23167.7	12118.4	5128	5766.57	4574	6319.79	15803.6	37398.2	56324.6	7164.14	6456.14	2608.36	14848.6	16133.6	7734.74
2.96458	22420.1	4320.03	6738.69	3582.52	8121.37	4685.09	18081.1	9178.78	3868.46	22079.8	12583	12266.7	3088.61	12879.4	7515.24	8539.3	3832.21	5736.71	8548.21	14357		21686.8	4656.92	2735.38	10210.8	1620.94	46495.8	11649.1	6901.48	17026.7	11003.8	7364.65	3174.71	11590.9	1082.52	5193.74	10568	35900.7	58958.9	4914.47	7050.64	2485.76	12728.7	13113.3	3175.97
3.04693	15000	3226.18	7849.23	2236.48	3217.1	8610.96	12762.7	6815.85	1835.34	14373.6	10116.5	8280.4	3891.88	10550.5	2006.42	12237	5705.94	3559.95	4963.36	14100.3		23745.2	2696.77	3499.84	6845.21	1730.77	40904.9	11911.5	3847.05	10083.4	6771.17	9672.09	5588.77	7987.58	1644.47	3403.86	11451.5	27683	52597.2	4165.02	2572.05	2247.13	16154.1	10299.8	5997.78
3.12928	11425.5	3353.99	4264.9	2027.57	4188.65	8075.25	12866.8	4772.81	1307.12	10018.3	8297.25	4766.98	3061.13	8761.59	5987.37	10764.4	4619.17	2062.43	4770.81	10199.3		25608.2	3687.39	5102.39	9092.64	1675.16	24179.9	10720.2	4468.55	5961.06	5077.59	7930.87	5655.92	5963.02	1997.16	2825.07	11653.6	16523.3	47058.6	2454.47	2403.37	1784.3	18076.7	7177.13	6467.27
3.21163	7930.77	1919.64	3384.2	2130.94	3195.82	9500.8	17186.8	6846.29	2876.84	6539	6581.82	5740.27	2032.93	7459.96	5779.08	4789.9	3356.39	2112.84	6379.9	12525.3		25156.8	4696.01	3821.5	8530.48	2516.05	14413.2	14968.5	1413.75	9903.5	5923.21	5387.15	4309.51	4474.15	3183.73	5182.87	6925.04	17556.4	45340.9	3539.94	2076.49	1647.64	15082.1	2677.11	5661.83
3.29398	5260.11	4339.95	3133.91	3078.41	2422.68	10181.3	13826.9	3898.72	2331.67	6889.47	4964.8	4910.89	3642.74	5380.05	3265.04	5469.46	1555.33	2545.07	8751.79	7201.51		20726.5	5631.78	3686.8	5986.52	2614.74	7587.02	15122.9	1618.94	4959.86	2818.8	7783.79	3745.68	4060.46	2278.47	4740.97	4436.33	15108.4	33085.5	2563.43	1323.54	1603.41	8340.59	4031.64	4295.28
3.37633	4850.9	3847.53	3042.84	2528.12	3033.37	12156.5	11686.6	1755.59	1447.56	6171.49	6272.9	5439.04	3731.36	3273.07	2332.62	4269.65	3811.13	4174.98	5929.5	6905.65		16037.4	5104.21	3776.53	7285.87	2046.64	15080.5	18870.8	1070.25	3514.89	2083.41	4173.77	4948.73	3234.24	2582.23	3632.3	4292.56	10298.9	25750.4	2545.57	2582.19	2228.08	9535.1	7581.26	5856.07
3.45868	3436.86	3381.86	2297.16	1261.79	3412.55	12039.5	11093.8	4264.86	1075.71	2830.48	6237.79	4591.21	3023.74	3114.86	2674.81	3481.98	3385.38	3163.49	5236.83	5503.64		12034	7415.71	3515	6448.86	3384.71	12390.5	14655.9	1789.71	1823.71	3521.86	4763	7517	3438.57	3116.36	1441.32	2665.71	4428	17037.1	3753.5	3853.21	2054.93	7250.36	7375.62	7254.77
3.54103	2567.03	4064.53	5077.79	1714.77	2386.12	19966.3	9166.34	4161.32	1274.3	3903.1	6093.05	4752.79	4712.85	5658.54	4228.77	4341.25	936.136	3904.19	2504.81	4783.34		12042.5	8670.56	2576.16	6456.4	2431.49	9157.62	15682	3264.52	3566.34	3367.46	3892.26	9987.94	3940.56	2610.61	1580.51	1508.61	6643.74	18187.9	5580.46	2006.44	1102.53	6235.38	5552.37	7469.28
3.62338	1905.97	3733.41	3186.85	1952.15	3786.98	14735.3	11149.1	3419.97	1196.98	3641.18	7078.82	5098.36	4716.8	4248.08	2039.73	3041.1	2122.72	2378.72	1860.57	4435.44		12674.1	6216.97	2987.4	6064.92	2331.05	10554.3	11518.6	1941.22	4648.92	3506.57	9058.41	8105.92	4244.29	2330.98	2327.47	2878.77	5887.95	13659.1	1273.26	2483.74	2479.49	10738.2	6285.83	7534.95
3.70573	1595.73	1581.17	3266.57	4205.62	5789.23	8216.58	9880.91	1893.31	1160.74	4286.86	6644.65	5724.4	4297.25	4156.42	2315.08	2589.61	2794.28	1334.14	2047.57	5886.57		11088.9	5417.69	4331.67	7080.79	1721.51	10305.1	7664.01	2952.34	1990.94	2520.95	7141.83	6963.32	2732.16	1652.17	1748.15	2009.75	4599.14	9260.32	2211.21	1712.09	2261.63	10252.8	3885.61	6312.76
3.78808	2490.85	3653.87	4283.76	2121.86	6532.94	14107.5	9077.46	2085.01	1374.11	1991.31	3118.51	7346.59	3791.46	6007.17	2134.87	1831.84	1836.19	2432.55	2517.63	3896.22		13301.1	3346.51	3216.84	6185.14	4272.39	7187.44	9143.16	2942.9	7718.67	2147.34	4788.38	10860.1	4929.73	2515.53	2551.99	4378.16	4707.29	4344.71	3223.78	1929.8	1806.67	7736.14	3043.86	8130.06
3.87043	3882.64	2973.14	3367.32	1645.63	6361.28	19333.4	12276.8	2368.9	1630.09	1577.22	3916.6	6411.1	3765.33	3065.13	4088.84	2557.14	3286.84	4906.78	3129.45	4530.52		11333.2	5582.73	6490.78	3536.9	3087.45	4961.47	11308	2279.13	4276.19	2830.63	4929.71	7650.54	5730.43	3146.65	2581.06	3256.69	4406.92	3107.24	1533.49	2303.08	1140.81	7921.4	2424.64	9177.82
3.95278	3625.01	3790.15	4126.39	2383.72	11864	22547	5959.78	2816.77	1784.21	1644.03	3492.91	8319.93	2680.93	4829.74	3230.22	1307.52	2341.93	4400.24	2159.29	4432.83		15378.8	6986.04	5554.16	3826.15	1885.67	9109.1	10463	2027.91	2448.32	3873.22	7150.42	9160.99	4827.7	4398.4	3130.1	2714.23	4574.5	1789.68	2243.75	1999.22	1968.11	5464.37	2892.78	10572.8
4.03513	1023	6614	5770.94	4442	13805.3	22449.2	7072.39	6804.5	1825	2487.5	1809	7410.17	4391.33	4231.5	2827.17	2068.72	1446.33	4632.61	1576	1622.67		25507	7224	3433	6587	1716	8057.33	14920.1	1527	1321	4386	6339.5	7120	5976	4934	3805.25	6427	5902	4980	1836.5	2149.5	1349	5823.5	3141.83	12287.4
